# Supplementary material for: A genetic screen for Drosophila social isolation mutants and analysis of sex pistol
Source: PubMed Central journal article supplement (PMC8405609; doi:10.1038/s41598-021-96871-x), 2021-08-30
Supplement: 41598_2021_96871_MOESM1_ESM.pdf [file 41598_2021_96871_MOESM1_ESM.pdf]

**A genetic screen for *Drosophila* social isolation mutants and analysis of *sex pistol***

Mark Eddison

Janelia Research Campus

19700 Helix Drive

Ashburn, VA 20147

Email: [eddisonm@janelia.hhmi.org](mailto:eddisonm@janelia.hhmi.org)

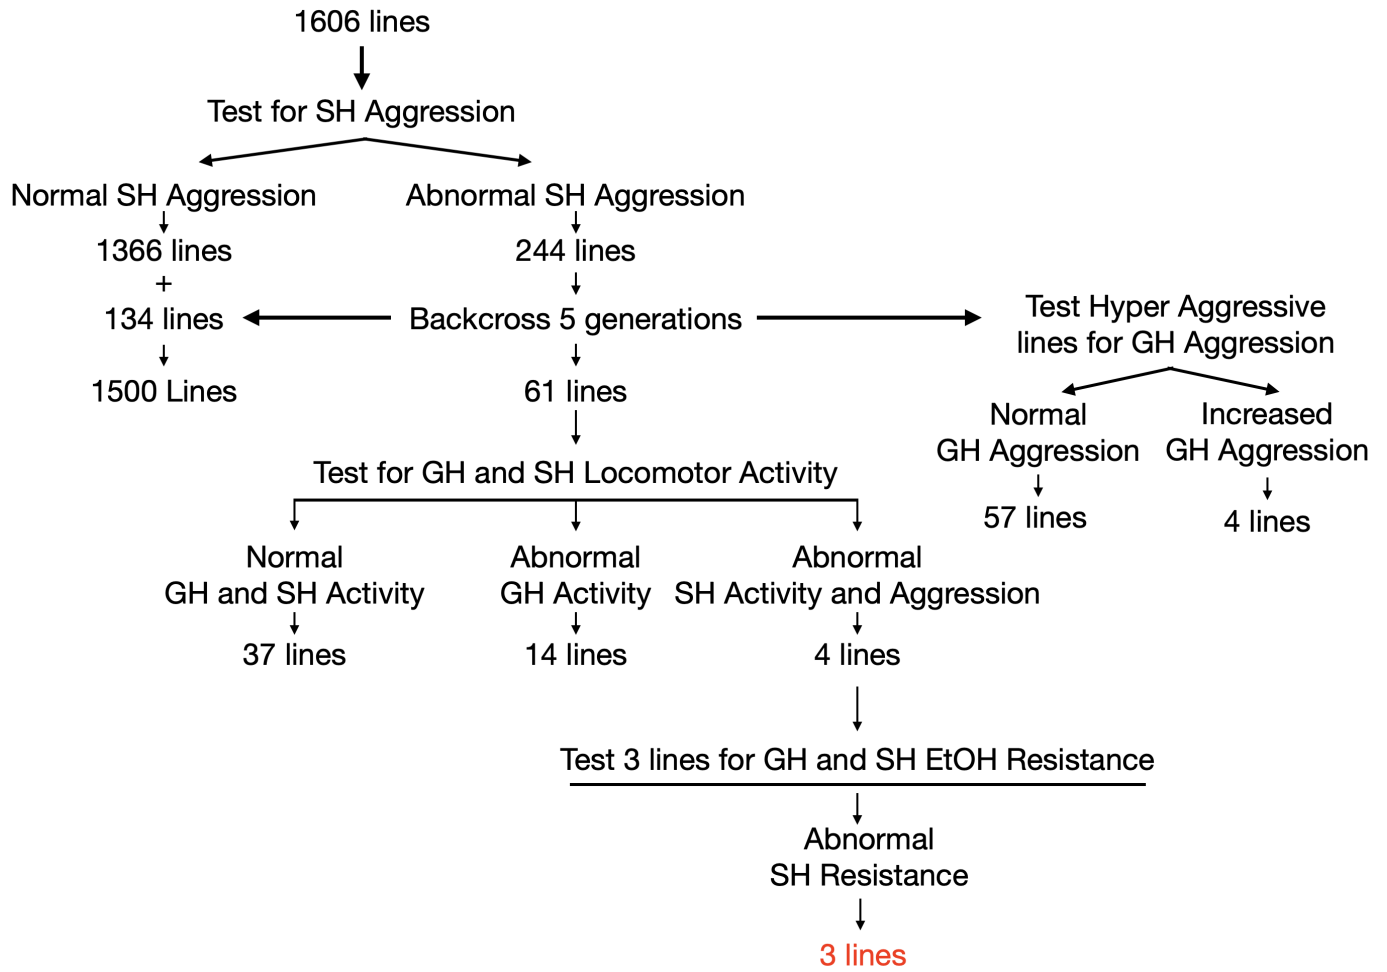

Figure S1) The strategy to identify isolation mutants from a population of 1606 *P-GAL4* insertions

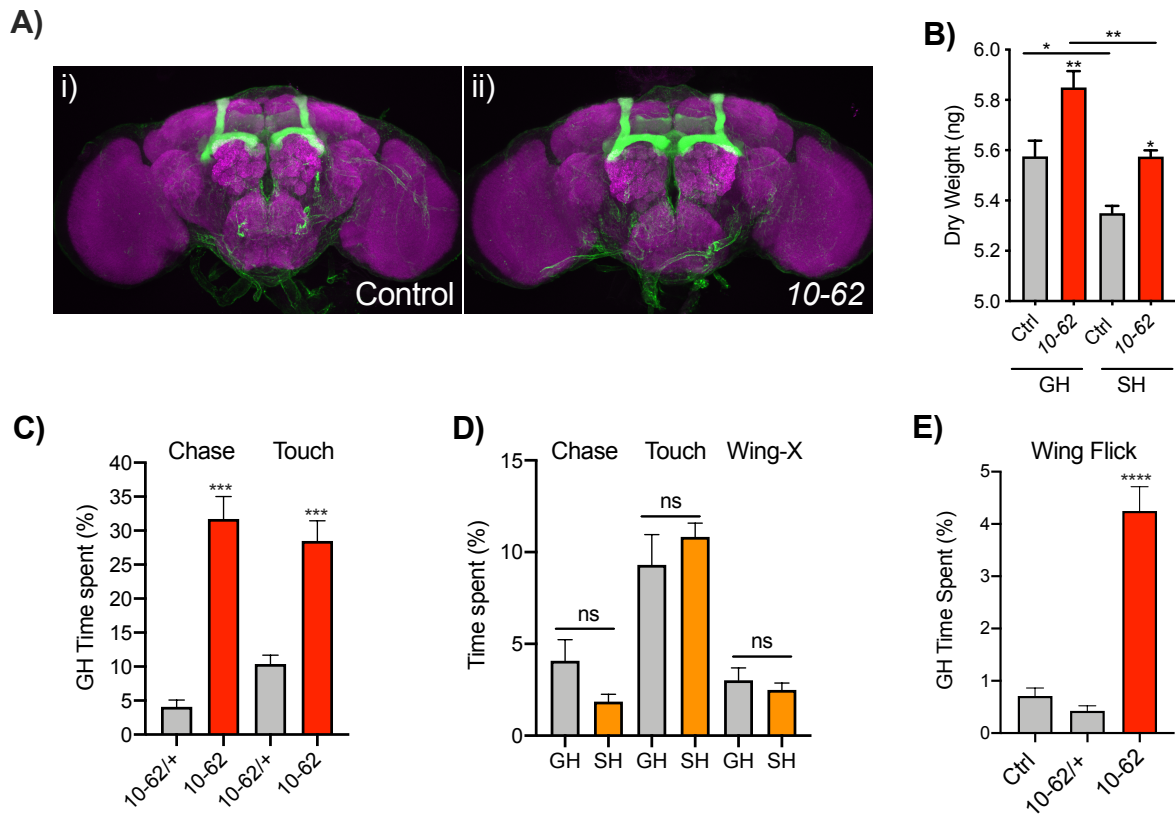

**Figure S2) 10-62 characterization (A)** Using Fas2 Antibody (green) to stain the mushroom bodies I detected no major morphological disruptions in the brain of 10-62. **(B)** 10-62 males weigh significantly more than control males when GH (\*\*  $p = 0.0087$ ) and SH (\*  $p = 0.0306$ ). Compared to the GH condition, both control (\*  $p = 0.0306$ ) and 10-62 male flies (\*\*  $p = 0.0087$ ) weighed less when SH ( $n = 4$ , One-Way ANOVA with Tukey's MCT). **(C)** GH 10-62 males also show increased chasing and touching when groups of 20 GH males were placed in the fly bowl ( $p < 0.0002$ ;  $n = 8$ , Mann-Whitney Test). **(D)** Isolation did not increase chase, touch or single wing extension of screen control flies in the fly bowl ( $p > 0.05$ ;  $n = 6$  Unpaired t test). **(E)** GH 10-62 males have increased wing-flicks in the fly bowl (\*\*\*\*  $p = 0.0001$ ;  $n = 10$ , One-way ANOVA with Tukey's MCT).

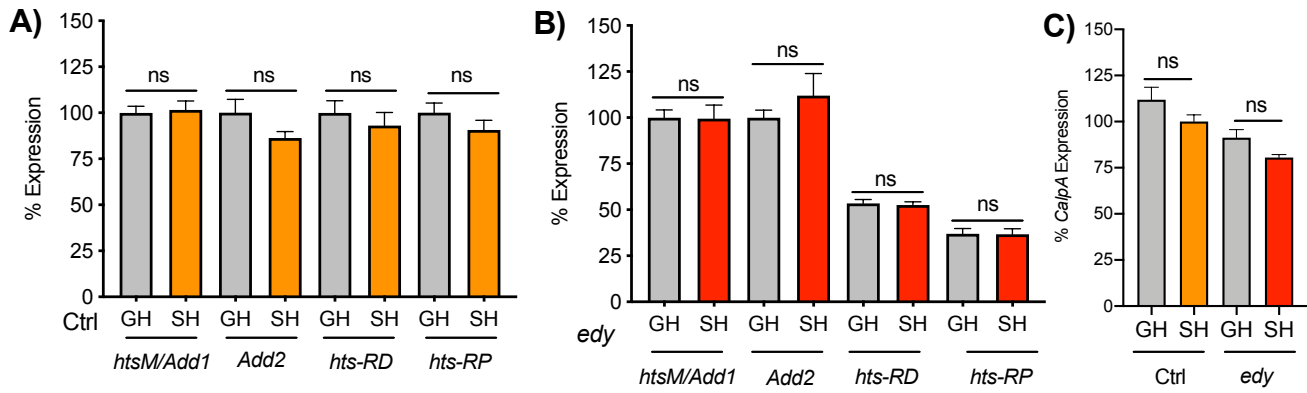

**Figure S3) Isolation does not affect *hts* or *CalpA* transcription.** Four major *hts* transcripts are unaffected by isolation in both **(A)** control and **(B)** *sxp* flies ( $p > 0.05$ ,  $n = 3 - 6$ , Unpaired t-test). **(C)** *CalpA* is unaffected by isolation in both control and *sxp* flies ( $p > 0.05$ ,  $n = 3$ , Unpaired t-test).

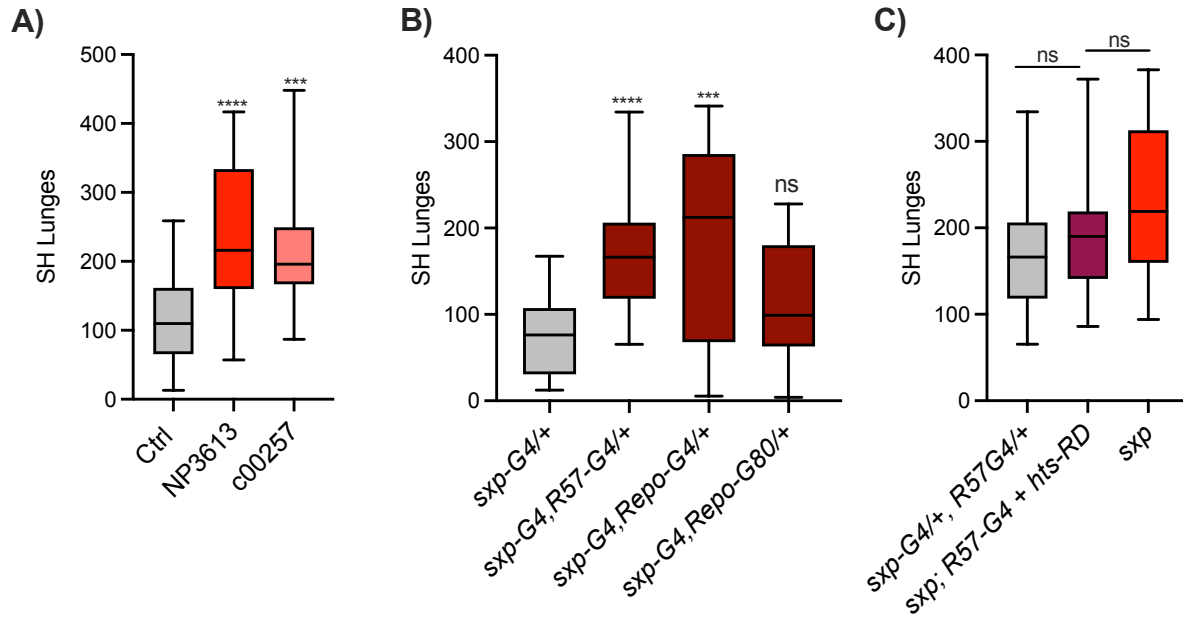

**Figure S4) Analysis of *hts* aggression. (A)** *hts* P-*GAL4*, NP3613 that inserts close to *sxp-GAL4*, was hyperaggressive (\*\*\*\*  $p < 0.0001$ ,  $n = 22-24$ ) as was *hts* P-Bac C00257, that inserts  $\sim 15\text{kb}$  5' of *CalpA* (\*\*\*)  $p = 0.0001$ ,  $n = 24$ , Kruskal-Wallis Test, with Dunn's MCT). **(B)** The combination of *sxp-G4/+* with *R57C10-GAL4/+* (pan-neuronal), *Repo-GAL4/+* (pan-glia) or *dILP3-GAL4/+* (insulin neurons), but not *Repo-GAL80/+*, increased SH aggression (\*\*\*\*  $p < 0.0001$   $n = 20-25$ , Kruskal-Wallis Test with Dunn's MCT). **(C)** Rescue by pan-neuronal expression of *hts-RD* was inconclusive ( $p > 0.05$ ,  $n = 24-25$ ), Kruskal-Wallis Test with Dunn's MCT).

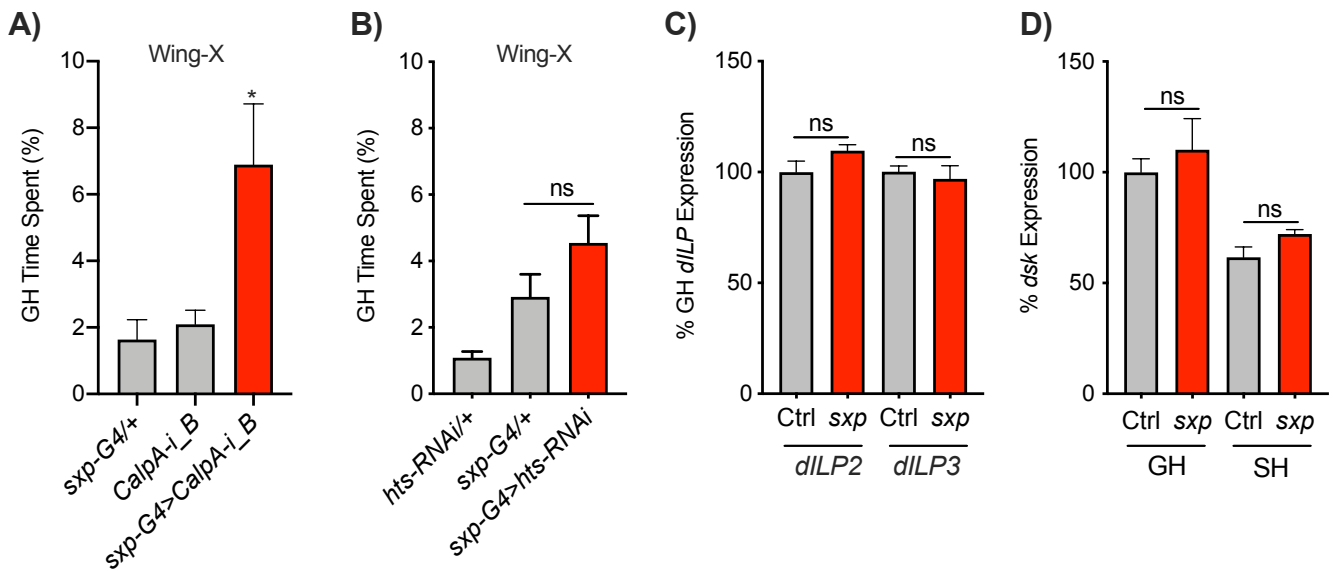

**Figure S5) Knockdown of *hts* in *sxp-GAL4* neurons did not increase male-male courtship** **(A)** Driving an independent insertion of *UAS-CalpA-RNAi* with *sxp-G4* increased GH single-wing extensions (\*  $p < 0.037$ ,  $n = 5-6$ , One-way ANOVA with Tukey's MCT). **(B)** Driving a *UAS-hts-RNAi* with *sxp-G4* did not increase single-wing extensions ( $p > 0.05$   $n = 8$ , One-way ANOVA with Tukey's MCT). **(C)** *dILP2* and *dILP3* expression levels are unaffected in GH *sxp* ( $p > 0.05$ ,  $n = 6$ , Unpaired t-test). **(D)** *Dsk* expression is unaffected in GH and SH *sxp* ( $p = 0.632$ ,  $0.608$ ,  $n = 4$ , Two-way ANOVA with Sidak's MCT).

## Supplementary Tables and Figure Legends

**Table S1)** Tables of the 46 hyper-aggressive mutants and 15 hypo-aggressive mutants identified from the screen, the P-element insertion site and candidate gene.

**Table S2)** Tables showing GH and SH daytime activity of SH aggressive mutants.

**Table S3)** Table showing 4 aggression and activity mutants.

**Table S4)** Tables showing GH and SH ethanol resistance of 3 aggressive and activity mutants.

**Figure S1) The strategy to identify isolation mutants from a population of 1606 *P-GAL4* insertions**

**Figure S2) *10-62* characterization (A)** Using Fas2 Antibody (green) to stain the mushroom bodies I detected no major morphological disruptions in the brain of *10-62*. **(B)** *10-62* males weigh significantly more than control males when GH (\*\*  $p = 0.0087$ ) and SH (\*  $p = 0.0306$ ). Compared to the GH condition, both control (\*  $p = 0.0306$ ) and *10-62* male flies (\*\*  $p = 0.0087$ ) weighed less when SH ( $n = 4$ , One-Way ANOVA with Tukey's MCT). **(C)** GH *10-62* males also show increased chasing and touching when groups of 20 GH males were placed in the fly bowl ( $p < 0.0002$ ;  $n = 8$ , Mann-Whitney Test). **(D)** Isolation did not increase chase, touch or single wing extension of screen control flies in the fly bowl ( $p > 0.05$ ;  $n = 6$  Unpaired t test). **(E)** GH *10-62* males have increased wing-flicks in the fly bowl (\*\*\*\*  $p = 0.0001$ ;  $n = 10$ , One-way ANOVA with Tukey's MCT).

**Figure S3) Isolation does not affect *hts* or *CalpA* transcription.** Four major *hts* transcripts are unaffected by isolation in both **(A)** control and **(B)** *sxp* flies ( $p > 0.05$ ,  $n = 3 - 6$ , Unpaired t-test). **(C)** *CalpA* is unaffected by isolation in both control and *sxp* flies ( $p > 0.05$ ,  $n = 3$ , Unpaired t-test).

**Figure S4) Analysis of *hts* aggression.** **(A)** *hts* P-*GAL4*, *NP3613* that inserts close to *sxp-GAL4*, was hyperaggressive (\*\*\*\*  $p < 0.0001$ ,  $n = 22-24$ ) as was *hts* P-Bac *C00257*, that inserts ~15kb 5' of *CalpA* (\*\*\*)  $p = 0.0001$ ,  $n = 24$ , Kruskal-Wallis Test, with Dunn's MCT). **(B)** The combination of *sxp-G4/+* with *R57C10-GAL4/+* (pan-neuronal) or *Repo-GAL4/+* (pan-glia), but not *Repo-GAL80/+*, increased SH aggression (\*\*\*\*  $p < 0.0001$   $n = 20 -25$ , Kruskal-Wallis Test with Dunn's MCT). **(C)** Rescue by pan-neuronal expression of *hts-RD* was inconclusive ( $p > 0.05$ ,  $n = 24-25$ ), Kruskal-Wallis Test with Dunn's MCT).

**Figure S5) Knockdown of *hts* in *sxp-GAL4* neurons did not increase male-male courtship (A)** Driving an independent insertion of *UAS-CalpA-RNAi* with *sxp-G4* increased GH single-wing extensions (\*  $p < 0.037$ ,  $n = 5-6$ , One-way ANOVA with Tukey's MCT). **(B)** Driving a *UAS-hts-RNAi* with *sxp-G4* did not increase single-wing extensions ( $p > 0.05$   $n = 8$ , One-way ANOVA with Tukey's MCT). **(C)** *dILP2* and *dILP3* expression levels are unaffected in GH *sxp* ( $p > 0.05$ ,  $n = 6$ , Unpaired t-test). **(D)** *Dsk* expression is unaffected in GH and SH *sxp* ( $p = 0.632$ ,  $0.608$ ,  $n = 4$ , Two-way ANOVA with Sidak's MCT).
